# Supplementary material for: Association between Carbohydrate Intake and the Prevalence of Metabolic Syndrome in Korean Women
Source: MDPI journal article supplement (doi:10.3390/nu13093098), 2021-09-03
Supplement: s1 [file s1]

## Supplementary Tables

**Table S1.** General characteristics of the study participants according to metabolic syndrome status<sup>1</sup>

|                               | Controls (n=3073) | Cases (n=1221) | p-value <sup>3</sup> |
|-------------------------------|-------------------|----------------|----------------------|
| Age (years)                   |                   |                |                      |
| <50                           | 1677 (54.5)       | 302 (24.7)     | <0.001               |
| 50-60                         | 754 (24.5)        | 386 (31.6)     |                      |
| ≥60                           | 642 (20.9)        | 533 (43.7)     |                      |
| BMI (kg/m <sup>2</sup> )      |                   |                |                      |
| <23                           | 1122 (36.5)       | 110 (9.0)      | <0.001               |
| 23-25                         | 892 (29.0)        | 229 (18.8)     |                      |
| ≥25                           | 1059 (34.5)       | 882 (72.2)     |                      |
| Residential location          |                   |                |                      |
| Rural area                    | 1307 (42.5)       | 776 (63.6)     | <0.001               |
| Urban area                    | 1766 (57.5)       | 445 (36.5)     |                      |
| Marital status                |                   |                |                      |
| No                            | 391 (12.7)        | 241 (19.7)     | <0.001               |
| Yes                           | 2671 (87.2)       | 972 (80.1)     |                      |
| Unknown                       | 11 (0.4)          | 8 (0.7)        |                      |
| Occupation                    |                   |                |                      |
| Professional, Office          | 80 (2.6)          | 15 (1.2)       | <0.001               |
| Service, Sales                | 329 (10.7)        | 81 (6.6)       |                      |
| Agriculture, manufacturing    | 700 (22.8)        | 385 (31.5)     |                      |
| Housewife, others             | 1955 (63.6)       | 736 (60.3)     |                      |
| Unknown                       | 9 (0.3)           | 4 (0.3)        |                      |
| Education level               |                   |                |                      |
| Middle school or less         | 1879 (61.1)       | 990 (81.1)     | <0.001               |
| High school                   | 956 (31.1)        | 175 (14.3)     |                      |
| College or more               | 219 (7.1)         | 44 (3.6)       |                      |
| Unknown                       | 19 (0.6)          | 12 (1.0)       |                      |
| Household income <sup>2</sup> |                   |                |                      |
| Low (<200 won)                | 1951 (63.5)       | 945 (77.4)     | <0.001               |
| Medium (200-400 won)          | 856 (27.9)        | 207 (17.0)     |                      |
| High (≥400 won)               | 202 (6.6)         | 48 (3.9)       |                      |
| Unknown                       | 64 (2.1)          | 21 (1.7)       |                      |
| Alcohol consumption           |                   |                |                      |
| Never                         | 2094 (68.1)       | 943 (77.2)     | <0.001               |
| Ever                          | 966 (31.6)        | 271 (22.3)     |                      |
| Unknown                       | 13 (0.4)          | 7 (0.6)        |                      |
| Smoking status                |                   |                |                      |
| Never                         | 2896 (94.2)       | 1133 (92.9)    | 0.018                |
| Ever                          | 131 (4.3)         | 73 (6.1)       |                      |
| Unknown                       | 46 (1.5)          | 15 (1.2)       |                      |
| Physical activity (METs/d)    |                   |                |                      |
| Q1 (<720)                     | 757 (24.6)        | 295 (24.2)     | <0.001               |
| Q2 (720-1155)                 | 806 (26.2)        | 280 (22.9)     |                      |
| Q3 (1155-1965)                | 784 (25.5)        | 253 (20.7)     |                      |
| Q4 (≥1965)                    | 639 (20.8)        | 358 (29.3)     |                      |
| Unknown                       | 87 (2.8)          | 35 (2.9)       |                      |

Abbreviations: BMI, body mass index; METs, metabolic equivalents

<sup>1</sup>Data are presented as n (%); <sup>2</sup>Unit is 10,000 won in Korean currency (\$1 = 1,103.50 Korean won as of 24 December 2020); <sup>3</sup>Tests of association by chi-square test (categorical variables).

**Table S2.** Daily intake of energy and nutrients in the subjects according to carbohydrate intake in controls<sup>1</sup>

|                           | Quartiles of Carbohydrate Intake <sup>2</sup> |                 |                 |                 | <i>p</i> -value <sup>3</sup> |
|---------------------------|-----------------------------------------------|-----------------|-----------------|-----------------|------------------------------|
|                           | Q1 (n = 768)                                  | Q2 (n = 768)    | Q3 (n = 768)    | Q4 (n = 769)    |                              |
| Energy (kcal/day)         | 1900.4 ± 691.3                                | 1854.8 ± 494.2  | 1786.3 ± 502.4  | 1935.4 ± 745.7  | <0.001                       |
| <b>Macronutrients</b>     |                                               |                 |                 |                 |                              |
| Carbohydrate (g/day)      | 311.6 ± 22.2                                  | 346.7 ± 6.4     | 366.4 ± 5.5     | 393.3 ± 13.2    | <0.001                       |
| Protein (g/day)           | 80.7 ± 10.3                                   | 70.6 ± 6.4      | 64.2 ± 5.5      | 56.2 ± 6.2      | <0.001                       |
| Fat (g/day)               | 47.6 ± 9.8                                    | 34.7 ± 3.7      | 27.8 ± 3.4      | 19.2 ± 4.7      | <0.001                       |
| %Energy from carbohydrate | 62.9 ± 4.7                                    | 70.0 ± 2.1      | 74.2 ± 2.0      | 79.3 ± 2.8      | <0.001                       |
| %Energy from protein      | 16.0 ± 2.0                                    | 14.0 ± 1.3      | 12.7 ± 1.2      | 11.2 ± 1.3      | <0.001                       |
| %Energy from fat          | 20.5 ± 4.0                                    | 15.1 ± 2.2      | 12.0 ± 2.1      | 8.4 ± 2.5       | <0.001                       |
| <b>Minerals</b>           |                                               |                 |                 |                 |                              |
| Calcium (mg)              | 632.5 ± 237.3                                 | 558.0 ± 182.9   | 478.8 ± 165.9   | 390.6 ± 155.0   | <0.001                       |
| Phosphorus (mg)           | 1205.7 ± 183.5                                | 1116.6 ± 143.2  | 1033.2 ± 132.2  | 928.4 ± 18.6    | <0.001                       |
| Iron (mg)                 | 12.8 ± 3.0                                    | 11.8 ± 3.0      | 11.0 ± 2.7      | 10.2 ± 2.9      | <0.001                       |
| Potassium (mg)            | 2959.6 ± 785.3                                | 2723.7 ± 652.9  | 2552.2 ± 661.3  | 2464.1 ± 816.8  | <0.001                       |
| Sodium (mg)               | 3321.8 ± 1371.0                               | 3222.6 ± 1195.4 | 3058.1 ± 1286.9 | 3094.7 ± 1485.8 | <0.001                       |
| Zinc (ug)                 | 10.0 ± 2.8                                    | 9.1 ± 1.6       | 8.6 ± 1.6       | 7.9 ± 1.3       | <0.001                       |
| <b>Vitamins</b>           |                                               |                 |                 |                 |                              |
| Vitamin A (RE)            | 646.0 ± 357.4                                 | 564.3 ± 302.1   | 505.3 ± 290.9   | 484.7 ± 350.3   | <0.001                       |
| Vitamin B1 (mg)           | 1.5 ± 0.3                                     | 1.3 ± 0.2       | 1.2 ± 0.2       | 1.1 ± 0.2       | <0.001                       |
| Vitamin B2 (mg)           | 1.3 ± 0.3                                     | 1.1 ± 0.2       | 1.0 ± 0.2       | 0.8 ± 0.2       | <0.001                       |
| Niacin (mg)               | 18.7 ± 3.3                                    | 16.2 ± 2.4      | 14.9 ± 2.0      | 13.9 ± 2.1      | <0.001                       |
| Vitamin B6 (mg)           | 2.0 ± 0.4                                     | 1.9 ± 0.3       | 1.8 ± 0.3       | 1.8 ± 0.4       | <0.001                       |
| Vitamin C (mg)            | 140.1 ± 71.5                                  | 130.5 ± 68.3    | 128.7 ± 64.2    | 154.7 ± 98.7    | <0.001                       |
| Vitamin E (mg)            | 11.4 ± 3.5                                    | 9.8 ± 2.6       | 9.2 ± 2.5       | 8.7 ± 3.0       | <0.001                       |
| Folate (ug)               | 276.5 ± 93.7                                  | 266.6 ± 84.9    | 250.5 ± 79.8    | 249.6 ± 98.3    | <0.001                       |

<sup>1</sup>Data are expressed as the mean ± standard deviation; <sup>2</sup>The intake levels of carbohydrates were categorized into quartiles according to the distribution in the control group (Q1: < 67.0, Q2: 67.0-71.4, Q3: 71.4-75.2, Q4: ≥ 75.2 % of energy); <sup>3</sup>General linear model (GLM) was used to analyze the p-value after adjusting for age, residential location, and education

**Table S3.** Food group intake according to the level of carbohydrate intake in controls<sup>1</sup>

| Food group (g/day)       | Quartiles of carbohydrate intake <sup>2</sup> |               |               |               | <i>p</i> -value <sup>3</sup> |
|--------------------------|-----------------------------------------------|---------------|---------------|---------------|------------------------------|
|                          | Q1 (n = 768)                                  | Q2 (n = 768)  | Q3 (n = 768)  | Q4 (n = 769)  |                              |
| Grains                   | 508.0 ± 149.8                                 | 649.4 ± 111.1 | 722.8 ± 108.5 | 822.5 ± 173.7 | <0.001                       |
| Noodles                  | 23.6 ± 22.3                                   | 20.1 ± 18.6   | 29.7 ± 20.4   | 15.0 ± 17.8   | <0.001                       |
| Rice cake                | 6.9 ± 13.5                                    | 5.6 ± 8.8     | 6.0 ± 11.5    | 5.7 ± 14.0    | 0.007                        |
| Breads                   | 19.7 ± 26.1                                   | 14.8 ± 20.8   | 12.0 ± 19.3   | 7.2 ± 13.2    | <0.001                       |
| Snacks                   | 14.5 ± 19.8                                   | 10.3 ± 14.2   | 8.0 ± 12.1    | 5.1 ± 9.5     | <0.001                       |
| Potatoes                 | 25.2 ± 25.7                                   | 24.6 ± 24.6   | 25.5 ± 33.8   | 23.5 ± 35.1   | 0.222                        |
| Legumes                  | 50.8 ± 49.8                                   | 45.7 ± 44.6   | 41.8 ± 43.5   | 31.0 ± 28.6   | <0.001                       |
| Nuts                     | 5.1 ± 8.2                                     | 3.9 ± 7.4     | 3.4 ± 9.5     | 3.1 ± 7.2     | <0.001                       |
| Kimchi                   | 172.5 ± 125.2                                 | 191.0 ± 117.8 | 194.5 ± 129.1 | 221.3 ± 156.2 | <0.001                       |
| Green, yellow vegetables | 116.3 ± 99.8                                  | 95.0 ± 75.2   | 91.0 ± 81.5   | 95.3 ± 95.6   | <0.001                       |
| Light-colored vegetables | 47.8 ± 38.8                                   | 41.4 ± 41.5   | 36.6 ± 30.1   | 33.1 ± 35.0   | <0.001                       |
| Mushrooms                | 12.9 ± 13.7                                   | 10.1 ± 14.9   | 7.5 ± 10.7    | 4.7 ± 7.7     | <0.001                       |
| Fruits/fruit juice       | 275.0 ± 233.7                                 | 263.5 ± 224.9 | 276.6 ± 216.6 | 399.4 ± 370.6 | <0.001                       |
| Chickens                 | 13.4 ± 16.3                                   | 7.7 ± 8.9     | 5.3 ± 6.3     | 3.6 ± 5.1     | <0.001                       |
| Red meats                | 77.8 ± 51.1                                   | 42.9 ± 24.7   | 29.4 ± 19.8   | 17.1 ± 13.7   | <0.001                       |
| Processed meat           | 2.2 ± 5.0                                     | 1.3 ± 3.4     | 0.8 ± 2.7     | 0.3 ± 1.4     | <0.001                       |
| Eggs                     | 19.2 ± 18.9                                   | 14.9 ± 16.2   | 11.5 ± 13.7   | 7.5 ± 10.5    | <0.001                       |
| Fish                     | 45.7 ± 36.6                                   | 33.1 ± 24.7   | 24.2 ± 18.4   | 14.7 ± 13.8   | <0.001                       |
| Salted seafood           | 2.8 ± 6.1                                     | 1.7 ± 3.3     | 1.9 ± 5.2     | 1.4 ± 4.5     | <0.001                       |
| Seaweeds                 | 2.9 ± 2.6                                     | 2.4 ± 2.0     | 2.1 ± 2.0     | 1.8 ± 1.8     | <0.001                       |
| Milk                     | 127.7 ± 142.7                                 | 105.1 ± 114.3 | 76.7 ± 100.0  | 36.3 ± 67.1   | <0.001                       |
| Dairy products           | 53.1 ± 64.3                                   | 50.7 ± 64.3   | 42.7 ± 59.9   | 29.3 ± 60.2   | <0.001                       |

<sup>1</sup>Data are expressed as the mean ± standard deviation; <sup>2</sup>The intake levels of carbohydrates were categorized into quartiles according to the distribution in the control group (Q1: < 67.0, Q2: 67.0-71.4, Q3: 71.4-75.2, Q4: ≥ 75.2 % of energy); <sup>3</sup>General linear model (GLM) was used to analyze the *p*-value after adjusting for age, residential location, and education

**Table S4.** Association between carbohydrate intake and the risk of metabolic syndrome, stratified by the intakes of different food groups<sup>1</sup>

| Food Group                              | All Women |                  |                 | Low Carbohydrate Intake |                  |                 | High Carbohydrate Intake |                  |                 |
|-----------------------------------------|-----------|------------------|-----------------|-------------------------|------------------|-----------------|--------------------------|------------------|-----------------|
|                                         | Low       | High             | <i>p</i> -value | Low                     | High             | <i>p</i> -value | Low                      | High             | <i>p</i> -value |
| <b><i>Kimchi</i></b>                    |           |                  |                 |                         |                  |                 |                          |                  |                 |
| No. Controls/cases                      | 1536/594  | 1537/627         | 0.117           | 817/219                 | 719/206          | 0.523           | 719/375                  | 818/421          | 0.119           |
| OR (95% CI) <sup>2</sup>                | 1.0 (ref) | 0.89 (0.78–1.03) |                 | 1.0 (ref)               | 0.93 (0.74–1.17) |                 | 1.0 (ref)                | 0.87 (0.72–1.04) |                 |
| <b><i>Vegetables without kimchi</i></b> |           |                  |                 |                         |                  |                 |                          |                  |                 |
| No. Controls/cases                      | 1536/619  | 1537/602         | 0.190           | 660/171                 | 876/254          | 0.456           | 876/448                  | 661/348          | 0.148           |
| OR (95% CI) <sup>2</sup>                | 1.0 (ref) | 1.10 (0.95–1.27) |                 | 1.0 (ref)               | 1.09 (0.87–1.37) |                 | 1.0 (ref)                | 1.14 (0.95–1.37) |                 |
| <b><i>Vegetables</i></b>                |           |                  |                 |                         |                  |                 |                          |                  |                 |
| No. Controls/cases                      | 1537/576  | 1536/645         | 0.602           | 744/191                 | 792/234          | 0.784           | 793/385                  | 744/411          | 0.521           |
| OR (95% CI) <sup>2</sup>                | 1.0 (ref) | 1.04 (0.90–1.20) |                 | 1.0 (ref)               | 1.03 (0.82–1.30) |                 | 1.0 (ref)                | 1.06 (0.89–1.27) |                 |
| <b><i>Fruits</i></b>                    |           |                  |                 |                         |                  |                 |                          |                  |                 |
| No. Controls/cases                      | 1537/594  | 1536/627         | 0.751           | 834/232                 | 702/193          | 0.735           | 703/362                  | 834/434          | 0.603           |
| OR (95% CI) <sup>2</sup>                | 1.0 (ref) | 1.02 (0.89–1.18) |                 | 1.0 (ref)               | 0.96 (0.76–1.21) |                 | 1.0 (ref)                | 1.05 (0.88–1.26) |                 |
| <b><i>Dairy foods</i></b>               |           |                  |                 |                         |                  |                 |                          |                  |                 |
| No. Controls/cases                      | 1536/739  | 1537/482         | 0.004           | 563/168                 | 973/257          | 0.333           | 973/571                  | 564/225          | 0.014           |
| OR (95% CI) <sup>2</sup>                | 1.0 (ref) | 0.81 (0.70–0.93) |                 | 1.0 (ref)               | 0.89 (0.71–1.13) |                 | 1.0 (ref)                | 0.78 (0.64–0.95) |                 |
| <b><i>Meats</i></b>                     |           |                  |                 |                         |                  |                 |                          |                  |                 |
| No. Controls/cases                      | 1537/774  | 1536/447         | 0.087           | 294/100                 | 1242/325         | 0.286           | 1243/674                 | 294/122          | 0.896           |
| OR (95% CI) <sup>2</sup>                | 1.0 (ref) | 0.88 (0.75–1.02) |                 | 1.0 (ref)               | 0.86 (0.66–1.13) |                 | 1.0 (ref)                | 1.02 (0.79–1.30) |                 |

Abbreviations: CI, confidence interval; OR, odds ratio

<sup>1</sup>The intake levels of carbohydrates and other food groups were categorized into two groups according to the distribution in the control group.<sup>2</sup>Tests of association were from logistic regression and were adjusted for age, residence area and education
